# Supplementary material
Source: PubMed Central journal article supplement (PMC1986628)
Supplement: pnas_0706668104_1.pdf [file pnas_0706668104_1.pdf]

|          |                            | Treatment                     |                        |                                |
|----------|----------------------------|-------------------------------|------------------------|--------------------------------|
|          |                            | HL independent                | HL dependent           |                                |
| Genotype | <u>hpPARP2 independent</u> |                               | <b>T</b><br>#3882      | → HL regulated genes           |
|          | <u>hpPARP2 dependent</u>   | <b>G</b><br>#293              | <b>G&amp;T</b><br>#593 |                                |
|          |                            | ↓<br>Up (#106)<br>Down (#187) |                        | ↘ PARP2 and HL regulated genes |
