# Supplementary material
Source: PubMed Central journal article supplement (PMC1986628)
Supplement: pnas_0706668104_6.pdf [file pnas_0706668104_6.pdf]

**Table 6. Transcripts slightly higher induced in the hpAtPARP2 plants during HL stress, sorted according to functional category**

| Functional category               | Affymetrix Probe set name | AGI code (TAIR 2004-06-01) | Description                                                      | Fold change hpAtPARP2 vs C24-0h | Fold change hpAtPARP2 vs C24-2h | Fold change hpAtPARP2 vs C24-4h | Fold change hpAtPARP2 vs C24-6h |
|-----------------------------------|---------------------------|----------------------------|------------------------------------------------------------------|---------------------------------|---------------------------------|---------------------------------|---------------------------------|
| <b>Starch metabolism (10)</b>     |                           |                            |                                                                  |                                 |                                 |                                 |                                 |
|                                   | 263912_at                 | At2g36390                  | 1,4-alpha-glucan branching enzyme                                | 1.431                           | 1.241                           | 1.545                           | 1.851                           |
|                                   | 247216_at                 | At5g64860                  | 4-alpha-glucanotransferase / disproportionating enzyme, putative | 2.395                           | 1.408                           | 1.391                           | 1.832                           |
|                                   | 248687_at                 | At5g48300                  | ADP-glucose pyrophosphorylase (ADG1)                             | 1.332                           | 1.163                           | 1.104                           | 1.299                           |
|                                   | 260412_at                 | At1g69830                  | Alpha-amylase                                                    | 1.919                           | 1.053                           | 1.250                           | 1.366                           |
|                                   | 256746_at                 | At3g29320                  | Glucan phosphorylase, putative                                   | 1.892                           | 1.136                           | 1.132                           | 1.685                           |
|                                   | 257144_at                 | At3g27300                  | Glucose-6-phosphate 1-dehydrogenase / G6PD (ACG9)                | 1.366                           | 1.151                           | 1.213                           | 1.242                           |
|                                   | 246829_at                 | At5g26570                  | Glycoside hydrolase starch-binding domain-containing protein     | 1.488                           | 1.411                           | 1.230                           | 1.500                           |
|                                   | 257017_at                 | At3g19620                  | Glycosyl hydrolase family 3 protein                              | 1.662                           | 1.496                           | 2.076                           | 2.628                           |
|                                   | 255070_at                 | At4g09020                  | Isoamylase / starch debranching enzyme, putative                 | 1.878                           | 2.218                           | 1.549                           | 1.728                           |
|                                   | 262784_at                 | At1g10760                  | Starch excess protein (SEX1)                                     | 1.581                           | 1.148                           | 1.211                           | 1.514                           |
| <b>Response to stress/ABA (6)</b> |                           |                            |                                                                  |                                 |                                 |                                 |                                 |
|                                   | 262629_at                 | At1g06460                  | 31.2 kDa small heat shock family protein                         | 1.307                           | 1.058                           | 1.281                           | 1.330                           |
|                                   | 263495_at                 | At2g42530                  | Cold-responsive protein / cold-regulated protein (cor15b)        | 2.195                           | 1.598                           | 1.541                           | 1.379                           |
|                                   | 245523_at                 | At4g15910                  | Drought-responsive protein / drought-induced protein (Di21)      | 1.007                           | 1.107                           | 2.101                           | 2.240                           |
|                                   | 253581_at                 | At4g30660                  | Low temperature and salt responsive protein, putative            | 1.986                           | 1.116                           | 1.325                           | 1.477                           |
|                                   | 266225_at                 | At2g28900                  | Mitochondrial import inner membrane translocase subunit Tim17/22 | 2.140                           | 1.242                           | 1.268                           | 1.391                           |
|                                   | 247307_at                 | At5g63860                  | UVB-resistance protein (UVR8)                                    | 1.303                           | 1.151                           | 1.221                           | 1.364                           |
| <b>Transcription factor (1)</b>   |                           |                            |                                                                  |                                 |                                 |                                 |                                 |
|                                   | 256092_at                 | At1g20696                  | High mobility group protein beta2 (HMGbeta2)                     | 1.235                           | 1.073                           | 1.237                           | 1.272                           |
| <b>Unknown (7)</b>                |                           |                            |                                                                  |                                 |                                 |                                 |                                 |
|                                   | 261203_at                 | At1g12845                  | Expressed protein                                                | 1.727                           | 1.807                           | 1.732                           | 1.960                           |
|                                   | 259591_at                 | At1g28150                  | Expressed protein                                                | 1.152                           | 1.134                           | 1.243                           | 1.327                           |
|                                   | 251753_at                 | At3g55760                  | Expressed protein                                                | 1.653                           | 1.431                           | 1.422                           | 1.753                           |
|                                   | 251559_at                 | At3g58010                  | Expressed protein                                                | 1.148                           | 1.169                           | 1.391                           | 1.249                           |
|                                   | 251155_at                 | At3g63160                  | Expressed protein                                                | 1.504                           | 1.079                           | 1.196                           | 1.229                           |
|                                   | 255013_at                 | At4g10000                  | Expressed protein                                                | 1.342                           | 1.093                           | 1.420                           | 1.461                           |
|                                   | 250127_at                 | At5g16380                  | Expressed protein                                                | 1.703                           | 1.295                           | 1.571                           | 1.517                           |
| <b>Miscellaneous (18)</b>         |                           |                            |                                                                  |                                 |                                 |                                 |                                 |
|                                   | 252565_at                 | At3g46000                  | Actin-depolymerizing factor, putative (ADF2)                     | 1.324                           | 1.063                           | 1.077                           | 1.236                           |
|                                   | 263678_at                 | At1g04420                  | Aldo/keto reductase family protein                               | 1.111                           | 1.072                           | 1.392                           | 1.208                           |
|                                   | 252391_at                 | At3g47860                  | Apolipoprotein D-related                                         | 1.409                           | 1.102                           | 1.203                           | 1.307                           |
|                                   | 267152_at                 | At2g31040                  | ATP synthase protein I -related                                  | 1.403                           | 1.034                           | 1.141                           | 1.347                           |
|                                   | 266399_at                 | At2g38670                  | Ethanolamine-phosphate cytidyltransferase, putative              | 1.291                           | 1.068                           | 1.333                           | 1.231                           |
|                                   | 246007_at                 | At5g08410                  | Ferredoxin-thioredoxin reductase, putative                       | 1.530                           | 1.246                           | 1.420                           | 1.491                           |
|                                   | 250006_at                 | At5g18660                  | Isoflavone reductase-related                                     | 1.042                           | 1.124                           | 1.166                           | 1.379                           |
|                                   | 264048_at                 | At2g22400                  | NOL1/NOP2/sun family protein                                     | -1.253                          | -1.110                          | -1.218                          | 1.053                           |
|                                   | 250503_at                 | At5g09820                  | Plastid-lipid associated protein                                 | -1.145                          | 1.041                           | 1.209                           | 1.343                           |
|                                   | 253834_at                 | At4g27800                  | Protein phosphatase 2C PPH1                                      | 1.450                           | 1.114                           | 1.309                           | 1.385                           |
|                                   | 256441_at                 | At3g10940                  | Protein phosphatase-related                                      | 1.402                           | 1.158                           | 1.347                           | 1.668                           |
|                                   | 256676_at                 | At3g52180                  | Protein tyrosine phosphatase                                     | 1.825                           | 1.111                           | 1.235                           | 1.570                           |
|                                   | 264045_at                 | At2g22450                  | Riboflavin biosynthesis protein, putative                        | 2.918                           | 1.007                           | 1.541                           | 1.437                           |
|                                   | 250617_at                 | At5g07290                  | RNA recognition motif (RRM)-containing protein                   | 1.373                           | -1.114                          | 1.039                           | 1.181                           |
|                                   | 254764_at                 | At4g13250                  | Short-chain dehydrogenase/reductase (SDR) family protein         | 1.613                           | 1.125                           | 1.142                           | 1.272                           |
|                                   | 262601_at                 | At1g15310                  | Signal recognition particle 54 kDa protein 1 (SRP54)             | 1.306                           | 1.262                           | 1.035                           | 1.823                           |
|                                   | 266673_at                 | At2g29630                  | Thiamine biosynthesis family protein                             | 1.197                           | 1.156                           | 1.552                           | 1.712                           |
|                                   | 258398_at                 | At3g15360                  | Thioredoxin M-type 4                                             | 1.287                           | 1.077                           | 1.231                           | 1.182                           |
