# Supplementary material
Source: PubMed Central journal article supplement (PMC1986628)
Supplement: pnas_0706668104_9.pdf [file pnas_0706668104_9.pdf]

**Table 9. Transcripts showing a delayed HL-repression in the hpAtPARP2 plants, sorted according to functional category**

| Functional category              | Affymetrix Probe set name | AGI code (TAIR 2004-06-01) | Description                                            | Fold change hpAtPARP2 vs C24-0h | Fold change hpAtPARP2 vs C24-2h | Fold change hpAtPARP2 vs C24-4h | Fold change hpAtPARP2 vs C24-6h |
|----------------------------------|---------------------------|----------------------------|--------------------------------------------------------|---------------------------------|---------------------------------|---------------------------------|---------------------------------|
| <b>Transcription factor (14)</b> |                           |                            |                                                        |                                 |                                 |                                 |                                 |
|                                  | 258026_at                 | At3g19290                  | ABA-responsive element-binding protein 2 (AREB2)       | 1.571                           | 1.293                           | 1.477                           | 1.602                           |
|                                  | 247041_at                 | At5g67180                  | AP2 domain-containing transcription factor             | 1.080                           | 1.249                           | 1.378                           | 2.198                           |
|                                  | 245593_at                 | At4g14550                  | Auxin-responsive AUX/IAA protein (IAA14)               | 1.727                           | 1.158                           | 1.214                           | 1.339                           |
|                                  | 259417_at                 | At1g02340                  | bHLH transcription factor 26 (HFR1)                    | 1.916                           | 1.253                           | 1.702                           | 1.792                           |
|                                  | 247340_at                 | At5g63700                  | C3HC4 type RING finger family protein                  | 1.096                           | 1.087                           | 1.041                           | 1.680                           |
|                                  | 253105_at                 | At4g35840                  | C3HC4-type RING finger family protein                  | 1.056                           | 1.159                           | 1.039                           | 1.572                           |
|                                  | 250320_at                 | At5g12840                  | CCAAT-binding transcription factor (CBF-B/NF-YA)       | -1.009                          | 1.343                           | 1.496                           | 1.670                           |
|                                  | 247601_at                 | At5g60850                  | Dof-type zinc finger domain-containing protein         | 1.515                           | 1.228                           | 1.440                           | 1.744                           |
|                                  | 247452_at                 | At5g62430                  | Dof-type zinc finger domain-containing protein         | 1.154                           | 1.126                           | 1.574                           | 1.790                           |
|                                  | 246211_at                 | At4g36730                  | G-box binding factor 1 (GBF1)                          | 1.341                           | 1.082                           | 1.411                           | 1.127                           |
|                                  | 250167_at                 | At5g15310                  | Myb family transcription factor (MYB106)               | 1.681                           | 1.286                           | 1.591                           | 2.063                           |
|                                  | 257855_at                 | At3g13040                  | Myb family transcription factor                        | -1.002                          | 1.028                           | 1.178                           | 1.439                           |
|                                  | 262969_at                 | At1g75710                  | Zinc finger (C2H2 type) family protein                 | -1.075                          | 1.675                           | 1.361                           | 1.911                           |
|                                  | 266695_at                 | At2g19810                  | Zinc finger (CCCH-type) family protein                 | 1.739                           | 1.647                           | 1.639                           | 1.883                           |
| <b>Photosynthesis (3)</b>        |                           |                            |                                                        |                                 |                                 |                                 |                                 |
|                                  | 251814_at                 | At3g54890                  | Chlorophyll A-B binding protein                        | 1.095                           | 1.032                           | 1.164                           | 1.225                           |
|                                  | 258239_at                 | At3g27690                  | Chlorophyll A-B binding protein (LHCB2:4)              | 1.180                           | 1.077                           | 1.654                           | 1.819                           |
|                                  | 262632_at                 | At1g06680                  | Photosystem II oxygen-evolving complex 23              | 1.065                           | 1.084                           | 1.140                           | 1.165                           |
| <b>Transport (3)</b>             |                           |                            |                                                        |                                 |                                 |                                 |                                 |
|                                  | 254034_at                 | At4g25960                  | Multidrug resistance P-glycoprotein, putative          | 1.049                           | 1.246                           | -1.082                          | 1.489                           |
|                                  | 248344_at                 | At5g52280                  | Protein transport protein-related                      | 1.268                           | 1.377                           | 1.320                           | 1.440                           |
|                                  | 255690_at                 | At4g00370;At4g00360        | Sugar transporter protein                              | 1.222                           | 1.267                           | 1.086                           | 1.419                           |
| <b>Signal transduction (2)</b>   |                           |                            |                                                        |                                 |                                 |                                 |                                 |
|                                  | 266600_at                 | At2g46070                  | Mitogen-activated protein kinase AtMPK12               | 1.060                           | 1.286                           | 1.614                           | 1.525                           |
|                                  | 259541_at                 | At1g20650                  | Protein kinase family protein                          | 1.563                           | 1.217                           | 1.354                           | 2.002                           |
| <b>Unknown (12)</b>              |                           |                            |                                                        |                                 |                                 |                                 |                                 |
|                                  | 261131_at                 | At1g19835                  | Expressed protein                                      | 1.423                           | 1.285                           | 1.489                           | 1.864                           |
|                                  | 264899_at                 | At1g23130                  | Expressed protein                                      | 1.309                           | 1.304                           | 1.341                           | 1.318                           |
|                                  | 255737_at                 | At1g25420                  | Expressed protein                                      | 1.218                           | 1.194                           | 1.262                           | 1.294                           |
|                                  | 262313_at                 | At1g70900                  | Expressed protein                                      | 1.372                           | 1.301                           | 1.316                           | 1.242                           |
|                                  | 259091_at                 | At3g04890                  | Expressed protein                                      | -1.021                          | 1.100                           | 1.398                           | 1.582                           |
|                                  | 258040_at                 | At3g21190                  | Expressed protein                                      | -1.302                          | 1.119                           | 1.130                           | 1.452                           |
|                                  | 252412_at                 | At3g47295                  | Expressed protein                                      | 1.031                           | 1.250                           | 1.420                           | 1.430                           |
|                                  | 252023_at                 | At3g52920                  | Expressed protein                                      | 1.160                           | 1.044                           | 1.222                           | 1.579                           |
|                                  | 251141_at                 | At5g01075                  | Expressed protein                                      | 1.182                           | 1.684                           | 1.532                           | 1.972                           |
|                                  | 250189_at                 | At5g14410                  | Expressed protein                                      | 1.310                           | 1.061                           | 1.542                           | 2.143                           |
|                                  | 249011_at                 | At5g44670                  | Expressed protein                                      | -1.369                          | 1.340                           | 2.009                           | 2.611                           |
|                                  | 247186_at                 | At5g65470                  | Expressed protein                                      | 1.219                           | 1.295                           | 1.246                           | 1.681                           |
| <b>Miscellaneous (22)</b>        |                           |                            |                                                        |                                 |                                 |                                 |                                 |
|                                  | 259012_at                 | At3g07360                  | Armadillo/beta-catenin repeat family protein           | 1.381                           | 1.350                           | 1.568                           | 1.592                           |
|                                  | 247461_at                 | At5g62100                  | BAG domain-containing protein                          | 1.693                           | 1.831                           | 1.859                           | 2.553                           |
|                                  | 250233_at                 | At5g13460                  | Calmodulin-binding family protein                      | 1.313                           | 1.145                           | 1.220                           | 1.709                           |
|                                  | 249327_at                 | At5g40890                  | Chloride channel protein (CLC-a)                       | 1.316                           | 1.082                           | 1.396                           | 1.533                           |
|                                  | 245550_at                 | At4g15330                  | Cytochrome P450 family protein                         | 1.022                           | 1.505                           | -1.050                          | 2.205                           |
|                                  | 264539_at                 | At1g55590                  | F-box family protein                                   | 1.377                           | 1.388                           | 1.246                           | 1.149                           |
|                                  | 260949_at                 | At1g06110                  | F-box family protein                                   | 1.217                           | 1.115                           | 1.276                           | 1.422                           |
|                                  | 253042_at                 | At4g37550                  | Formamide amidohydrolase, putative                     | 1.291                           | 1.214                           | 1.501                           | 1.938                           |
|                                  | 256020_at                 | At1g58290                  | Glutamyl-tRNA reductase 1                              | 1.367                           | -1.006                          | 1.094                           | 1.455                           |
|                                  | 260010_at                 | At1g68020                  | Glycosyl transferase family 20 protein                 | 1.610                           | 1.109                           | 1.311                           | 1.130                           |
|                                  | 265817_at                 | At2g18050                  | Histone H1-3 (HIS1-3)                                  | 2.189                           | 1.444                           | 2.858                           | 2.208                           |
|                                  | 263751_at                 | At2g21300                  | Kinesin motor family protein                           | -1.148                          | 1.166                           | -1.016                          | 1.948                           |
|                                  | 254547_at                 | At4g19860                  | Lecithin:cholesterol acyltransferase family protein    | 1.345                           | 1.042                           | 1.449                           | 1.324                           |
|                                  | 257093_at                 | At3g20570                  | Plastocyanin-like domain-containing protein            | 1.176                           | 1.593                           | 1.714                           | 1.266                           |
|                                  | 256785_at                 | At3g13720                  | Prenylated rab acceptor (PRA1)                         | 1.067                           | 1.178                           | 1.511                           | 1.460                           |
|                                  | 259660_at                 | At1g55260                  | Protease inhibitor/seed storage/lipid transfer protein | -1.120                          | 1.198                           | 1.103                           | 1.513                           |
|                                  | 263979_at                 | At2g42840                  | Protodermal factor 1 (PDF1)                            | 1.206                           | 1.778                           | 1.294                           | 1.445                           |
|                                  | 259287_at                 | At3g11490                  | Rac GTPase activating protein                          | 1.070                           | 1.157                           | 1.036                           | 1.875                           |
|                                  | 264802_at                 | At1g08560                  | Syntaxin-related protein                               | 1.315                           | 1.748                           | 1.122                           | 1.475                           |
|                                  | 253093_at                 | At4g37460                  | Tetrapeptide repeat (TPR)-containing protein           | 1.183                           | 1.181                           | 1.025                           | 1.254                           |
|                                  | 256527_at                 | At1g66100                  | Thionin, putative                                      | 1.298                           | 1.133                           | 1.484                           | 1.476                           |
|                                  | 248796_at                 | At5g47180                  | Vesicle-associated membrane family protein             | 1.638                           | 1.388                           | 1.568                           | 1.617                           |
