# Supplementary material
Source: PubMed Central journal article supplement (PMC1986628)
Supplement: pnas_0706668104_10.pdf [file pnas_0706668104_10.pdf]

Table 10. Functional categorization of cluster I using BiNGO

| GO-ID       | p-value         | corr p-value    | # selected | Genes in test set | # total | Description                                           |
|-------------|-----------------|-----------------|------------|-------------------|---------|-------------------------------------------------------|
| 7582        | 2.56E-05        | 3.68E-03        | 44         | 6283              |         | physiological process                                 |
| 8151        | 6.19E-05        | 3.68E-03        | 41         | 5803              |         | cellular physiological process                        |
| 9987        | 7.42E-05        | 3.68E-03        | 42         | 6065              |         | cellular process                                      |
| <b>8152</b> | <b>7.61E-05</b> | <b>3.68E-03</b> | <b>36</b>  | <b>4783</b>       |         | <b>metabolism</b>                                     |
| 9156        | 1.82E-04        | 3.68E-03        | 2          | 5                 |         | ribonucleoside monophosphate biosynthesis             |
| 9161        | 1.82E-04        | 3.68E-03        | 2          | 5                 |         | ribonucleoside monophosphate metabolism               |
| 9168        | 1.82E-04        | 3.68E-03        | 2          | 5                 |         | purine ribonucleoside monophosphate biosynthesis      |
| 9167        | 1.82E-04        | 3.68E-03        | 2          | 5                 |         | purine ribonucleoside monophosphate metabolism        |
| 9127        | 1.82E-04        | 3.68E-03        | 2          | 5                 |         | purine nucleoside monophosphate biosynthesis          |
| 9126        | 1.82E-04        | 3.68E-03        | 2          | 5                 |         | purine nucleoside monophosphate metabolism            |
| 9124        | 1.82E-04        | 3.68E-03        | 2          | 5                 |         | nucleoside monophosphate biosynthesis                 |
| 9123        | 1.82E-04        | 3.68E-03        | 2          | 5                 |         | nucleoside monophosphate metabolism                   |
| 44237       | 2.32E-04        | 4.33E-03        | 33         | 4407              |         | cellular metabolism                                   |
| 44249       | 2.61E-04        | 4.53E-03        | 14         | 1125              |         | cellular biosynthesis                                 |
| 9926        | 3.81E-04        | 5.79E-03        | 3          | 33                |         | auxin polar transport                                 |
| 9914        | 3.81E-04        | 5.79E-03        | 3          | 33                |         | hormone transport                                     |
| 6979        | 4.49E-04        | 6.42E-03        | 4          | 83                |         | response to oxidative stress                          |
| <b>6091</b> | <b>7.30E-04</b> | <b>9.57E-03</b> | <b>7</b>   | <b>348</b>        |         | <b>generation of precursor metabolites and energy</b> |
| 6800        | 7.49E-04        | 9.57E-03        | 4          | 95                |         | oxygen and reactive oxygen species metabolism         |
| 9058        | 8.44E-04        | 9.88E-03        | 14         | 1264              |         | biosynthesis                                          |
| 9404        | 8.94E-04        | 9.88E-03        | 3          | 44                |         | toxin metabolism                                      |
| 9407        | 8.94E-04        | 9.88E-03        | 3          | 44                |         | toxin catabolism                                      |
| 50896       | 1.25E-03        | 1.32E-02        | 17         | 1792              |         | response to stimulus                                  |
| 9636        | 1.90E-03        | 1.92E-02        | 3          | 57                |         | response to toxin                                     |
| 9260        | 2.39E-03        | 2.15E-02        | 2          | 17                |         | ribonucleotide biosynthesis                           |
| 9150        | 2.39E-03        | 2.15E-02        | 2          | 17                |         | purine ribonucleotide metabolism                      |
| 9152        | 2.39E-03        | 2.15E-02        | 2          | 17                |         | purine ribonucleotide biosynthesis                    |
| 9259        | 2.68E-03        | 2.33E-02        | 2          | 18                |         | ribonucleotide metabolism                             |
| <b>6810</b> | <b>3.07E-03</b> | <b>2.48E-02</b> | <b>12</b>  | <b>1135</b>       |         | <b>transport</b>                                      |
| 6163        | 3.31E-03        | 2.48E-02        | 2          | 20                |         | purine nucleotide metabolism                          |
| 6164        | 3.31E-03        | 2.48E-02        | 2          | 20                |         | purine nucleotide biosynthesis                        |
| 51234       | 3.37E-03        | 2.48E-02        | 12         | 1148              |         | establishment of localization                         |
| 51179       | 3.37E-03        | 2.48E-02        | 12         | 1148              |         | localization                                          |
| 6188        | 4.31E-03        | 2.91E-02        | 1          | 1                 |         | IMP biosynthesis                                      |
| 46040       | 4.31E-03        | 2.91E-02        | 1          | 1                 |         | IMP metabolism                                        |
| 6189        | 4.31E-03        | 2.91E-02        | 1          | 1                 |         | 'de novo' IMP biosynthesis                            |
| 42364       | 5.15E-03        | 3.39E-02        | 2          | 25                |         | water-soluble vitamin biosynthesis                    |
| 42221       | 6.63E-03        | 4.24E-02        | 9          | 791               |         | response to chemical stimulus                         |
| 9165        | 6.90E-03        | 4.30E-02        | 2          | 29                |         | nucleotide biosynthesis                               |
| 15980       | 7.10E-03        | 4.32E-02        | 3          | 91                |         | energy derivation by oxidation of organic compounds   |
| <b>6950</b> | <b>8.52E-03</b> | <b>4.65E-02</b> | <b>9</b>   | <b>823</b>        |         | <b>response to stress</b>                             |
| 6207        | 8.61E-03        | 4.65E-02        | 1          | 2                 |         | 'de novo' pyrimidine base biosynthesis                |
| 6206        | 8.61E-03        | 4.65E-02        | 1          | 2                 |         | pyrimidine base metabolism                            |
| 19856       | 8.61E-03        | 4.65E-02        | 1          | 2                 |         | pyrimidine base biosynthesis                          |
| 8535        | 8.61E-03        | 4.65E-02        | 1          | 2                 |         | cytochrome c oxidase complex assembly                 |
| 9110        | 9.40E-03        | 4.97E-02        | 2          | 34                |         | vitamin biosynthesis                                  |

#### Parameters

File created with BiNGO (c) on 23-nov-2006 at 9:40:37

ontology: process

curator: GO

Selected ontology file : R:\Mol-Bio\cytoscape\_2.3.2\plugins\BiNGO\GO\_Biological\_Process

Selected annotation file : R:\Mol-Bio\Cytoscape\_2.3.2\plugins\BiNGO\A\_thaliana\_ATH1\_ORF\_TAIR\_230606

Overrepresentation

Selected statistical test : Hypergeometric test

Selected correction : Benjamini & Hochberg False Discovery Rate (FDR) correction

Selected significance level : 0.05

Testing option : Test cluster versus complete annotation

Number of genes selected : 67

Total number of genes in annotation : 15538
