# Supplementary material
Source: PubMed Central journal article supplement (PMC1986628)
Supplement: pnas_0706668104_11.pdf [file pnas_0706668104_11.pdf]

Table 11. Functional categorization of cluster II using BiNGO

| GO-ID        | p-value         | corr p-value    | # selected | Genes in test set | # total     | Description                                           |
|--------------|-----------------|-----------------|------------|-------------------|-------------|-------------------------------------------------------|
| 6951         | 1.15E-22        | 2.55E-20        | 17         | 75                | 75          | response to heat                                      |
| <b>9266</b>  | <b>2.25E-17</b> | <b>2.48E-15</b> | <b>19</b>  | <b>209</b>        | <b>209</b>  | <b>response to temperature stimulus</b>               |
| <b>6950</b>  | <b>6.22E-17</b> | <b>4.58E-15</b> | <b>31</b>  | <b>823</b>        | <b>823</b>  | <b>response to stress</b>                             |
| 6457         | 2.23E-11        | 1.23E-09        | 13         | 165               | 165         | protein folding                                       |
| 50896        | 1.21E-10        | 5.33E-09        | 35         | 1792              | 1792        | response to stimulus                                  |
| 9628         | 3.80E-10        | 1.40E-08        | 28         | 1210              | 1210        | response to abiotic stimulus                          |
| 9615         | 1.70E-06        | 5.37E-05        | 4          | 15                | 15          | response to virus                                     |
| 51707        | 6.01E-05        | 1.59E-03        | 10         | 354               | 354         | response to other organism                            |
| 9613         | 6.47E-05        | 1.59E-03        | 9          | 287               | 287         | response to pest, pathogen or parasite                |
| <b>6118</b>  | <b>8.45E-05</b> | <b>1.87E-03</b> | <b>8</b>   | <b>231</b>        | <b>231</b>  | <b>electron transport</b>                             |
| <b>19538</b> | <b>1.42E-04</b> | <b>2.86E-03</b> | <b>22</b>  | <b>1559</b>       | <b>1559</b> | <b>protein metabolism</b>                             |
| 44267        | 2.69E-04        | 4.70E-03        | 21         | 1516              | 1516        | cellular protein metabolism                           |
| <b>6091</b>  | <b>2.76E-04</b> | <b>4.70E-03</b> | <b>9</b>   | <b>348</b>        | <b>348</b>  | <b>generation of precursor metabolites and energy</b> |
| 44237        | 3.21E-04        | 5.06E-03        | 43         | 4407              | 4407        | cellular metabolism                                   |
| 44260        | 4.96E-04        | 7.30E-03        | 21         | 1586              | 1586        | cellular macromolecule metabolism                     |
| 8152         | 1.02E-03        | 1.41E-02        | 44         | 4783              | 4783        | metabolism                                            |
| 9607         | 1.31E-03        | 1.70E-02        | 11         | 615               | 615         | response to biotic stimulus                           |
| 43170        | 1.51E-03        | 1.85E-02        | 25         | 2225              | 2225        | macromolecule metabolism                              |
| 8151         | 1.67E-03        | 1.94E-02        | 50         | 5803              | 5803        | cellular physiological process                        |
| 9404         | 2.45E-03        | 2.57E-02        | 3          | 44                | 44          | toxin metabolism                                      |
| 9407         | 2.45E-03        | 2.57E-02        | 3          | 44                | 44          | toxin catabolism                                      |
| 9626         | 4.20E-03        | 4.22E-02        | 2          | 16                | 16          | hypersensitive response                               |
| 9987         | 4.81E-03        | 4.62E-02        | 50         | 6065              | 6065        | cellular process                                      |
| 9636         | 5.10E-03        | 4.70E-02        | 3          | 57                | 57          | response to toxin                                     |
| 7582         | 6.02E-03        | 4.83E-02        | 51         | 6283              | 6283        | physiological process                                 |
| 51131        | 6.11E-03        | 4.83E-02        | 1          | 1                 | 1           | chaperone-mediated protein complex assembly           |
| 9413         | 6.11E-03        | 4.83E-02        | 1          | 1                 | 1           | response to flooding                                  |
| 43335        | 6.11E-03        | 4.83E-02        | 1          | 1                 | 1           | protein unfolding                                     |

**Parameters**

File created with BiNGO (c) on 23-nov-2006 at 9:49:26

ontology: process

curator: GO

Selected ontology file : R:\Mol-Bio\cytoscape\_2.3.2\plugins\BiNGO\GO\_Biological\_Process

Selected annotation file : R:\Mol-Bio\Cytoscape\_2.3.2\plugins\BiNGO\A\_thaliana\_ATH1\_ORF\_TAIR\_230606

Overrepresentation

Selected statistical test : Hypergeometric test

Selected correction : Benjamini & Hochberg False Discovery Rate (FDR) correction

Selected significance level : 0.05

Testing option : Test cluster versus complete annotation

Number of genes selected : 95

Total number of genes in annotation : 15538
