# Supplementary material
Source: PubMed Central journal article supplement (PMC1986628)
Supplement: pnas_0706668104_12.pdf [file pnas_0706668104_12.pdf]

**Table 12. Expression characteristics of the genes in cluster I during different oxidative stress experiments**

| Affymetrix Probe set name | AGI code  | Description                                            | hpAtPARP2 |        |         |         | CAT2HP1 |         | H <sub>2</sub> O <sub>2</sub> spray | Ozone fumigation | Syringolin treatment |
|---------------------------|-----------|--------------------------------------------------------|-----------|--------|---------|---------|---------|---------|-------------------------------------|------------------|----------------------|
|                           |           |                                                        | 0h HL     | 2h HL  | 4h HL   | 6h HL   | 3h HL   | 8h HL   |                                     |                  |                      |
| 248486_at                 | At5g1060  | NADPH respiratory burst oxidase protein C (RbohC)      | 1.049     | 1.059  | -3.310  | -24.637 | A       | A       | -2.755                              | 2.556            | 1.133                |
| 263210_at                 | At1g10585 | bHLH transcription factor                              | -2.401    | -2.610 | -6.801  | -17.494 | 85.124  | 16.028  | 3.421                               | 102.651          | -2.151               |
| 262518_at                 | At1g17170 | Glutathione S-transferase AtGSTU24                     | -2.489    | -1.391 | -10.029 | -16.197 | 78.533  | 107.716 | 31.63                               | 6.09             | 22.347               |
| 253316_s_at               | At4g34300 | Glycine-rich protein                                   | 1.090     | 1.050  | -1.660  | -12.473 | A       | A       | 1.291                               | 1.33             | 25.618               |
| 263403_at                 | At2g04040 | MATE efflux family protein                             | -1.612    | -1.543 | -3.363  | -11.448 | 2.302   | 9.569   | 2.554                               | 9.288            | 5.57                 |
| 260522_x_at               | At2g41730 | Expressed protein                                      | 1.004     | -2.688 | -12.441 | -11.393 | 27.265  | 32.931  | 2.496                               | 10.655           | 25.239               |
| 263823_s_at               | At2g40350 | DREB2-like transcription factor                        | 1.104     | 1.078  | -1.962  | -10.577 | 4.035   | 6.547   | 10.228                              | 8.249            | 22.915               |
| 266752_at                 | At2g47000 | ATP-binding cassette (ABC) transport protein           | -1.181    | -1.747 | -3.674  | -8.858  | 5.188   | 14.169  | 1.326                               | 3.074            | 72.205               |
| 245392_at                 | At4g15680 | Glutaredoxin family protein                            | -1.026    | -1.225 | -1.825  | -6.632  | 1.342   | 3.138   | -1.433                              | -1.232           | 1.05                 |
| 263231_at                 | At1g05680 | UDP-glucuronosyl/UDP-glucosyl transferase              | -1.570    | -2.347 | -18.220 | -5.381  | 338.785 | 195.798 | 8.644                               | 13.274           | 7.799                |
| 263402_at                 | At2g04050 | MATE efflux family protein                             | -1.334    | -1.404 | -4.226  | -5.207  | 2.761   | 5.422   | 1.762                               | 29.41            | 14.709               |
| 259297_at                 | At3g05360 | Disease resistance family protein / LRR family protein | -1.188    | -1.471 | -2.871  | -4.920  | A       | A       | 12.314                              | 8.335            | 20.827               |
| 257840_at                 | At3g25250 | Protein kinase family protein                          | -1.053    | 1.095  | -10.487 | -4.792  | 11.596  | 7.662   | 2.362                               | 8.425            | 32.75                |
| 266290_at                 | At2g29490 | Glutathione S-transferase AtGSTU1                      | -2.747    | -3.335 | -12.101 | -4.772  | 37.866  | 49.600  | 3.781                               | 4.977            | 14.231               |
| 247287_at                 | At5g64230 | Expressed protein                                      | -1.276    | -1.584 | -3.851  | -4.634  | 8.065   | 15.053  | 1.844                               | 1.606            | 7.748                |
| 261240_at                 | At1g32940 | Subtilase family protein                               | -1.497    | -1.615 | -1.714  | -4.437  | 4.765   | 15.286  | 2.772                               | 8.659            | 25.794               |
| 263515_at                 | At2g21640 | Expressed protein                                      | -1.147    | -1.693 | -2.445  | -4.323  | 4.855   | 11.150  | 1.037                               | 3.205            | 63.571               |
| 250182_at                 | At5g14470 | GHMP kinase-related protein                            | 1.033     | -1.011 | -10.950 | -4.292  | A       | A       | 1.487                               | -2.203           | 1.569                |
| 249494_at                 | At5g39050 | Transferase family protein                             | 1.068     | -2.722 | -5.056  | -4.011  | 8.451   | 6.143   | 10.372                              | 9.689            | 4.259                |
| 254549_at                 | At4g19880 | Glutathione S-transferase-related protein              | -1.167    | -1.601 | -3.465  | -3.695  | 6.002   | 4.220   | 3.9                                 | 2.217            | -1.222               |
| 246584_at                 | At5g14730 | Expressed protein                                      | -1.247    | -1.152 | -9.599  | -3.630  | 23.175  | 13.350  | 9.8                                 | 2.222            | 3.554                |
| 245506_at                 | At4g15700 | Glutaredoxin family protein                            | -1.267    | -1.149 | -2.562  | -3.559  | -1.719  | 1.885   | -1.393                              | 1.931            | 1.074                |
| 262118_at                 | At1g02850 | Glycosyl hydrolase family 1 protein                    | -1.308    | -1.397 | -2.379  | -3.477  | 3.184   | 2.823   | 1.396                               | 4.838            | -4.082               |
| 250094_at                 | At5g17380 | Pyruvate decarboxylase family protein                  | -1.582    | -1.172 | -2.129  | -3.344  | 3.769   | 3.895   | 2.086                               | 3.836            | 1.74                 |
| 258815_at                 | At3g04000 | Short-chain dehydrogenase/reductase                    | -1.209    | -1.059 | -2.480  | -3.342  | 6.003   | 2.045   | 1.374                               | 9.645            | -4.386               |
| 262251_at                 | At1g53760 | Expressed protein                                      | -1.653    | -1.554 | -1.591  | -3.308  | 2.944   | 2.657   | 1.546                               | 1.739            | 2.316                |
| 248381_at                 | At5g51830 | PKB-type carbohydrate kinase family protein            | -1.361    | -1.919 | -2.911  | -3.299  | 5.470   | 5.414   | 11.127                              | 6.559            | 8.183                |
| 255230_at                 | At4g05390 | Ferredoxin-NADP <sup>+</sup> reductase, putative       | -1.244    | -1.095 | -1.698  | -3.292  | 2.173   | 4.385   | 1.583                               | 2.582            | 1.021                |
| 246744_at                 | At5g27760 | Hypoxia-responsive family protein                      | -1.267    | -1.195 | -2.266  | -3.224  | 3.177   | 3.159   | 5.847                               | 5.476            | 2.998                |
| 253268_s_at               | At4g34135 | UDP-glucuronosyl/UDP-glucosyl transferase              | -1.587    | -2.448 | -10.773 | -3.034  | 11.307  | 6.565   | 10.301                              | 5.439            | 2.262                |
| 263073_at                 | At2g17500 | Auxin efflux carrier protein                           | -1.934    | -1.868 | -1.920  | -3.008  | 8.880   | 4.405   | 1.194                               | 2.472            | -1.684               |
| 255462_at                 | At4g02940 | Oxidoreductase, 2OG-Fe(II) oxygenase                   | -1.197    | -1.293 | -3.269  | -2.909  | 4.300   | 3.215   | 1.517                               | 2.702            | -1.230               |
| 255543_at                 | At4g01870 | Expressed protein                                      | -1.246    | -1.825 | -4.566  | -2.840  | 43.379  | 42.777  | 30.639                              | 8.608            | 19.701               |
| 257216_at                 | At3g14990 | DJ-1 family protein                                    | -1.068    | -1.024 | -2.401  | -2.778  | 5.924   | 7.011   | 2.577                               | 2.19             | -2.079               |
| 250252_at                 | At5g13750 | Transporter-related protein                            | -1.194    | -1.308 | -4.929  | -2.675  | 2.212   | 1.176   | 3.235                               | 4.713            | -5.051               |
| 251503_at                 | At3g59140 | ATP-binding cassette (ABC) transport protein           | -1.160    | 1.057  | -2.356  | -2.656  | 2.941   | 2.292   | 1.164                               | 2.202            | -2.793               |
| 252671_at                 | At3g44190 | Pyridine nucleotide-disulphide oxidoreductase          | -1.300    | -1.478 | -5.232  | -2.548  | 9.876   | 6.479   | 3.89                                | 2.873            | 2.679                |
| 259911_at                 | At1g72680 | Cinnamyl-alcohol dehydrogenase, putative               | -1.313    | -2.093 | -1.821  | -2.539  | 3.179   | 3.989   | 1.956                               | 4.874            | -1.445               |
| 248330_at                 | At5g52810 | Ornithine cyclodeaminase family protein                | -1.149    | -1.138 | -1.485  | -2.530  | 2.184   | 1.933   | 2.116                               | 6.614            | 1.558                |
| 251971_at                 | At3g53160 | UDP-glucuronosyl/UDP-glucosyl transferase              | 1.058     | 1.041  | -1.004  | -2.436  | A       | A       | 1.935                               | 7.969            | 1.228                |
| 250449_at                 | At5g10830 | Embryo-abundant protein-related                        | -1.364    | -1.294 | -5.575  | -2.410  | A       | A       | 6.237                               | 1.159            | 1.231                |
| 259980_at                 | At1g76520 | Auxin efflux carrier family protein                    | 1.069     | -1.414 | -1.829  | -2.285  | 2.593   | 1.427   | 1.417                               | 3.13             | -3.356               |
| 249984_at                 | At5g18400 | Expressed protein                                      | -1.747    | -1.189 | -1.826  | -2.269  | 2.441   | 2.888   | 2.307                               | 3.101            | 5.783                |
| 259875_s_at               | At1g76690 | 12-oxophytodienoate reductase (OPR2)                   | -1.459    | -1.585 | -4.624  | -2.243  | 9.316   | 5.346   | 25.012                              | 4.215            | 2.637                |
| 263904_at                 | At2g36380 | ATP-binding cassette (ABC) transport protein           | -1.166    | -1.929 | -3.612  | -2.223  | -1.111  | -1.077  | -1.328                              | 1.473            | 1.267                |
| 266756_at                 | At2g46950 | Cytochrome P450 family protein                         | 1.123     | -1.131 | -4.512  | -2.200  | A       | A       | 1.277                               | -1.366           | 1.015                |
| 262291_at                 | At1g70790 | C2 domain-containing protein                           | -1.187    | -1.003 | -1.247  | -2.194  | 1.091   | -1.215  | -1.570                              | 1.316            | -2.890               |
| 254204_at                 | At4g24160 | Hydrolase, alpha/beta fold family protein              | -1.033    | -1.695 | -5.233  | -2.164  | 6.312   | 5.536   | 10.816                              | 3.214            | 4.398                |
| 256308_s_at               | At1g30410 | ATP-binding cassette (ABC) transport protein           | 1.045     | -1.373 | -2.189  | -2.113  | 3.539   | 5.861   | 1.291                               | 3.417            | 1.168                |
| 266296_at                 | At2g29420 | Glutathione S-transferase, putative                    | -1.333    | -1.909 | -5.764  | -2.100  | 7.406   | 2.761   | 11.353                              | 4.146            | 1.676                |
| 262653_at                 | At1g14130 | 2-oxoglutarate-dependent dioxygenase, putative         | -1.162    | -1.255 | -3.044  | -2.079  | 2.141   | -1.961  | 1.343                               | 2.394            | -1.548               |
| 256589_at                 | At3g28730 | High mobility group protein (HMG)                      | 1.175     | -3.948 | -6.996  | -2.076  | 90.461  | 29.895  | 9.668                               | 4.666            | -1.205               |
| 249319_s_at               | At5g40880 | WD-40 repeat family protein                            | 1.262     | -1.106 | -1.795  | -2.038  | 1.905   | 3.789   | 1.021                               | -1.032           | 5.196                |
| 256385_at                 | At1g14320 | 60S ribosomal protein L10 (RPL10A)                     | -1.124    | -1.237 | -1.625  | -2.008  | 2.877   | 1.830   | 1.39                                | 1.448            | 1.199                |
| 265061_at                 | At1g61640 | ATP-binding cassette (ABC) transport protein           | -1.662    | -1.096 | -1.782  | -1.997  | 1.110   | 1.671   | 1.455                               | 1.656            | 2.163                |
| 263015_at                 | At1g23440 | Pyroglutamate-carboxylate peptidase family protein     | -1.148    | -1.238 | -1.449  | -1.941  | 1.724   | 2.042   | 1.224                               | 2.893            | -1.312               |
| 256453_at                 | At1g75270 | Dehydroascorbate reductase                             | -1.566    | -1.870 | -3.359  | -1.915  | 6.626   | 3.109   | 3.582                               | 1.769            | 1.626                |
| 248101_at                 | At5g55200 | Co-chaperone grpE protein, putative                    | -1.562    | -1.041 | -1.276  | -1.858  | 2.025   | 2.919   | 1.276                               | 2.306            | 9.722                |
| 261664_s_at               | At1g18320 | Mitochondrial import inner membrane translocase Tim17  | -1.990    | -1.433 | -1.556  | -1.854  | -1.020  | 1.018   | 1.006                               | -1.653           | 1.135                |
| 262262_at                 | At1g70780 | Expressed protein                                      | -1.365    | -1.656 | -1.923  | -1.834  | 1.330   | 1.045   | -1.024                              | 1.295            | -2.283               |
| 257037_at                 | At3g19130 | RNA-binding protein, putative                          | -1.137    | -1.224 | -1.781  | -1.795  | 1.551   | 1.447   | 1.24                                | 1.279            | 1.424                |
| 260592_at                 | At1g55850 | Cellulose synthase family protein                      | -1.366    | -2.089 | -3.866  | -1.760  | 3.422   | 1.389   | 4.581                               | 2.261            | -5.102               |
| 247272_at                 | At5g64300 | GTP cyclohydrolase II                                  | -1.065    | -1.278 | -2.127  | -1.757  | 1.636   | 1.515   | 2.824                               | 1.42             | -1.279               |
| 246042_at                 | At5g19440 | Cinnamyl-alcohol dehydrogenase (CAD)                   | -1.104    | -1.111 | -1.456  | -1.750  | 1.947   | 2.224   | 2.177                               | 3.083            | -1.072               |
| 261344_at                 | At1g79710 | Integral membrane transporter family protein           | -1.065    | -1.421 | -4.991  | -1.705  | 4.102   | 2.060   | 2.77                                | 1.102            | 1.36                 |
| 262422_at                 | At1g23440 | Pyroglutamate-carboxylate peptidase family protein     | -1.042    | -1.084 | -1.368  | -1.705  | 1.731   | 1.494   | 1.189                               | 2.277            | 1.266                |
| 263184_at                 | At1g05560 | UDP-glucose transferase (UGT75B2)                      | -1.187    | -2.336 | -5.986  | -1.698  | 22.399  | 9.744   | 10.381                              | 4.4              | -2.591               |
| 247989_at                 | At5g56350 | Pyruvate kinase, putative                              | -1.183    | -1.037 | -1.213  | -1.697  | 2.149   | 3.906   | -1.116                              | 2.478            | 9.377                |
| 267565_at                 | At2g30750 | Cytochrome P450 71A12                                  | 1.006     | 1.118  | 1.049   | -1.685  | A       | A       | -1.942                              | 3.408            | 6.378                |
| 253890_s_at               | At5g54100 | Expressed protein                                      | -1.678    | 1.045  | -1.358  | -1.669  | 2.048   | 3.231   | 1.041                               | 1.909            | 12.978               |
| 247283_at                 | At5g64250 | 2-nitropropane dioxygenase                             | -1.038    | -1.051 | -1.852  | -1.660  | 2.457   | 2.023   | 3.022                               | 3.46             | 1.297                |
| 265662_at                 | At2g24500 | Zinc finger (C2H2 type) family protein                 | -1.250    | -1.115 | -2.003  | -1.650  | 2.950   | 2.963   | 2.722                               | 1.352            | 3.293                |
| 265147_at                 | At1g51380 | Eukaryotic translation initiation factor 4A (eIF-4A)   | -1.456    | -1.224 | -2.001  | -1.632  | 1.004   | 1.218   | 1.646                               | -2.058           | 4.765                |
| 262611_at                 | At1g14060 | Expressed protein                                      | -1.617    | -1.030 | -1.562  | -1.618  | 1.479   | 1.614   | 1.583                               | 1.323            | 1.862                |
| 257708_at                 | At3g13330 | Expressed protein                                      | -1.009    | -1.142 | -1.473  | -1.605  | 1.435   | 3.107   | -1.005                              | 2.527            | 12.896               |
| 249515_at                 | At5g38530 | Tryptophan synthase-related protein                    | -1.653    | -1.191 | -1.738  | -1.552  | 1.476   | 2.668   | 1.281                               | 1.972            | -3.215               |
| 262745_at                 | At1g28600 | Lipase, putative                                       | -1.753    | -1.363 | -1.997  | -1.540  | -1.092  | -1.772  | 1.253                               | 1.113            | -3.322               |
| 248139_at                 | At5g54970 | Expressed protein                                      | -1.510    | -1.267 | -1.314  | -1.533  | 1.403   | 1.369   | -1.021                              | -1.106           | -2.985               |
| 256055_at                 | At1g07030 | Mitochondrial substrate carrier family protein         | -1.295    | -1.072 | -1.470  | -1.525  | 1.976   | 2.351   | 2.02                                | 1.898            | 1.191                |
| 246463_at                 | At5g16970 | NADP-dependent oxidoreductase, putative                | -1.055    | -1.249 | -2.076  | -1.517  | 4.832   | 3.161   | 6.403                               | 3.282            | -2.427               |
| 254343_at                 | At4g21990 | 5'-adenylylsulfate reductase (APR3)                    | -1.160    | -1.158 | -2.234  | -1.503  | 6.645   | 3.413   | 21.703                              | 2.052            | -7.519               |
| 245937_at                 | At5g19750 | Peroxisomal membrane 22 kDa family protein             | -1.273    | -1.172 | -1.418  | -1.481  | 1.301   | -1.175  | 1.139                               | -1.309           | -1.661               |
| 267162_s_at               | At2g37690 | Phosphoribosylamino                                    |           |        |         |         |         |         |                                     |                  |                      |

|             |           |                                                     |        |        |        |        |        |        |        |        |        |
|-------------|-----------|-----------------------------------------------------|--------|--------|--------|--------|--------|--------|--------|--------|--------|
| 258588_s_at | At3g04120 | NAD-dependent glyceraldehyde-3-P dehydrogenase      | -1.109 | -1.067 | -1.140 | -1.393 | 1.465  | 1.490  | 1.128  | 1.188  | 2.002  |
| 246594_at   | At1g13440 |                                                     |        |        |        |        |        |        |        |        |        |
| 258208_at   | At5g14800 | Pyrraline-5-carboxylate reductase                   | 1.032  | 1.062  | -1.469 | -1.389 | 1.222  | 1.904  | -1.218 | -1.181 | 2.742  |
| 259056_at   | At3g13930 | Dihydrolipoamide S-acetyltransferase, putative      | -1.085 | -1.067 | -1.341 | -1.385 | 1.313  | 1.080  | 1.263  | -1.277 | -1.064 |
| 267095_at   | At3g03420 | Ku70-binding family protein                         | -1.127 | -1.392 | -1.423 | -1.385 | 1.138  | 1.269  | -1.036 | 1.215  | 1.753  |
| 247679_at   | At2g38280 | AMP deaminase, putative                             | -1.396 | 1.038  | -1.304 | -1.376 | 1.196  | 1.489  | -1.083 | -1.063 | 1.302  |
| 246303_at   | At5g59540 | Oxidoreductase, 2OG-Fe(II) oxygenase family protein | -1.142 | -1.088 | -1.310 | -1.363 | 1.738  | 2.062  | 2.856  | 1.365  | -1.087 |
| 253281_at   | At3g51870 | Mitochondrial substrate carrier protein             | -1.522 | -1.242 | -1.931 | -1.286 | 1.151  | 1.205  | -1.139 | -1.957 | -1.344 |
| 253213_at   | At4g34138 | UDP-glucuronosyl/UDP-glucosyl transferase           | 2.512  | -2.729 | -4.544 | -1.278 | 9.225  | 6.820  | 3.223  | 1.606  | -2.475 |
| 247580_at   | At4g34910 | DEAD/DEAH box helicase, putative                    | -1.293 | 1.051  | -1.352 | -1.262 | 1.118  | 1.674  | -1.160 | -1.297 | 1.734  |
| 255455_at   | At5g61330 | rRNA processing protein-related                     | -1.376 | 1.044  | -1.178 | -1.256 | -1.036 | 1.468  | -1.116 | -1.605 | -1.100 |
| 249830_at   | At4g02930 | Elongation factor Tu, putative                      | -1.459 | 1.051  | -1.304 | -1.256 | 1.643  | 1.114  | -1.133 | 1.001  | 2.121  |
| 258114_at   | At5g23300 | Mitochondrial dihydroorotate dehydrogenase          | -1.659 | 1.063  | -1.482 | -1.221 | 1.206  | -1.006 | 1.1    | -1.832 | 1.448  |
| 246465_at   | At3g14650 | Cytochrome P450, putative                           | 1.112  | -1.244 | -2.198 | -1.214 | 1.620  | 1.375  | 1.856  | 1.624  | -1.335 |
| 256628_at   | At3g14660 |                                                     |        |        |        |        |        |        |        |        |        |
| 262117_at   | At5g17000 | NADP-dependent oxidoreductase, putative             | 1.053  | -1.085 | -2.784 | -1.205 | 2.027  | 1.654  | 5.018  | 6.948  | 1.073  |
| 250909_at   | At3g20000 | Mitochondrial outer membrane protein - TOM40        | -1.281 | -1.114 | -1.350 | -1.202 | 1.302  | 1.073  | 1.024  | -1.087 | 1.537  |
| 250192_at   | At1g02780 | 60S ribosomal protein L19 (RPL19A)                  | -1.138 | -1.004 | -1.093 | -1.117 | 1.151  | -1.008 | 1.014  | -1.081 | 1.041  |
| 265389_at   | At5g03700 | PAN domain-containing protein                       | -1.055 | -1.170 | -1.716 | -1.101 | A      | A      | 1.245  | 1.199  | -2.278 |
| 254981_at   | At5g14520 | Pescadillo-related protein                          | -1.302 | -1.113 | -1.445 | -1.090 | 1.169  | 1.699  | -1.248 | -1.148 | 2.44   |
|             | At2g20690 | Lumazine-binding family protein                     | -1.677 | 1.051  | -1.182 | -1.065 | 1.373  | -1.417 | -1.326 | -1.399 | -1.961 |
|             | At4g10480 | Nascent polypeptide associated complex protein      | -1.375 | -1.064 | -1.506 | -1.026 | 1.098  | 1.223  | -1.164 | -1.695 | 1.959  |

Number of genes showing at least threefold induction during the respective treatment

38 40 28 38 28

Relative expression data (transgenic to wild type or treatment to control) for all genes in cluster I are presented. Affymetrix probe set names, AGI codes, and descriptions are given. The induction/suppression of each gene by HL treatment in the hpAtPARP2 plants or catalase-deficient plants (CAT2HP1), or by the different oxidative stress causing treatments (H<sub>2</sub>O<sub>2</sub> spray, ozone fumigation, or syringolin treatment) is indicated. Yellow, orange, and red indicate transcript levels between three- and fourfold, four- and fivefold, and above fivefold, respectively. Expression data of transcripts with absent calls in both control and transgenic are indicated with A. For each oxidative stress experiment, the number of genes with at least threefold induction are indicated.
