# Supplementary material
Source: PubMed Central journal article supplement (PMC1986628)
Supplement: pnas_0706668104_13.pdf [file pnas_0706668104_13.pdf]

**Table 13. Expression characteristics of the genes in cluster II during different oxidative stress experiments**

| Affymetrix Probe set name | AGI code  | Description                                                        | hpAtPAP2 |        |         |        | CAT2HP1 |         | H <sub>2</sub> O <sub>2</sub> spray | Ozone fumigation | Syringolin treatment |
|---------------------------|-----------|--------------------------------------------------------------------|----------|--------|---------|--------|---------|---------|-------------------------------------|------------------|----------------------|
|                           |           |                                                                    | 0h HL    | 2h HL  | 4h HL   | 6h HL  | 3h HL   | 8h HL   |                                     |                  |                      |
| 252334_at                 | At3g48850 | Mitochondrial phosphate transporter, putative                      | -1.508   | -1.355 | -2.101  | -9.940 | 6.392   | 14.784  | 1.209                               | 7.943            | 13.924               |
| 248434_at                 | At5g51440 | 23.5 kDa mitochondrial small heat shock protein (HSP23.5-M)        | -2.726   | -2.677 | -9.695  | -8.460 | 12.825  | 53.640  | 20.297                              | 9.291            | 117.442              |
| 250296_at                 | At5g12020 | 17.6 kDa class II heat shock protein (HSP17.6-CII)                 | 1.732    | -2.793 | -9.584  | -7.498 | 7.486   | 65.256  | 104.971                             | 5.475            | 4.305                |
| 252908_at                 | At4g39670 | Expressed protein                                                  | -1.977   | -1.319 | -4.536  | -7.333 | 11.861  | 13.236  | 3.631                               | 36.247           | 38.53                |
| 266267_at                 | At2g29460 | Glutathione S-transferase, putative                                | -1.605   | -1.573 | -1.807  | -7.104 | 8.476   | 9.316   | 3.623                               | 47.061           | 11.038               |
| 258840_at                 | At3g04620 | Expressed protein                                                  | 1.088    | -1.905 | -3.357  | -6.749 | 5.517   | 29.191  | 1.464                               | 2.199            | 10.964               |
| 254059_at                 | At4g25200 | 23.6 kDa mitochondrial small heat shock protein (HSP23.6-M)        | 1.287    | -1.022 | -3.124  | -6.512 | 3.258   | 194.968 | 7.157                               | 11.487           | 26.969               |
| 253046_at                 | At4g37370 | Cytochrome P450, putative                                          | -1.145   | -1.297 | -5.753  | -5.774 | 31.204  | 27.058  | 28.213                              | 25.615           | 15.665               |
| 265221_s_at               | At2g02010 | Glutamate decarboxylase, putative                                  | -2.598   | 1.050  | -2.886  | -5.120 | 12.440  | 11.863  | 95.405                              | 86.891           | 21.106               |
| 259445_at                 | At1g02400 | Gibberellin 2-oxidase, putative                                    | -2.078   | -1.678 | -5.500  | -4.555 | 5.946   | 4.937   | 6.252                               | 2.279            | -2.717               |
| 247279_at                 | At5g64310 | Arabinogalactan-protein (AGP1)                                     | -1.112   | -2.212 | -2.926  | -4.328 | 4.504   | 2.368   | 3.431                               | 2.382            | 3.553                |
| 248332_at                 | At5g52640 | Heat shock protein 81-1 (HSP81-1)                                  | -2.545   | -1.558 | -2.624  | -4.095 | 6.486   | 24.891  | 11.91                               | 30.3             | 53.181               |
| 265499_at                 | At2g15480 | UDP-glucuronosyl/UDP-glucosyl transferase                          | -1.267   | -1.052 | -3.971  | -4.039 | 30.902  | 16.608  | 223.416                             | 16.3             | 22.112               |
| 266464_at                 | At2g47800 | Glutathione-conjugate transporter (MRP4)                           | -2.169   | -1.123 | -2.529  | -3.903 | 1.945   | 1.277   | 1.057                               | 2.187            | -1.953               |
| 251895_at                 | At3g54420 | Class IV chitinase (CHIV)                                          | -2.096   | -1.016 | -1.732  | -3.751 | 4.413   | 12.880  | -1.309                              | 3.031            | 2.073                |
| 258975_at                 | At3g01970 | WRKY family transcription factor 45                                | -2.523   | -1.341 | -2.171  | -3.640 | 1.726   | 1.780   | 3.015                               | 13.784           | 4.977                |
| 248551_at                 | At5g50200 | Expressed protein                                                  | -1.178   | -1.596 | -1.687  | -3.593 | 3.049   | 4.059   | -1.451                              | 2.026            | 1.577                |
| 250994_at                 | At5g02490 | Heat shock cognate 70 kDa protein 2 (HSC70-2)                      | -1.667   | -1.174 | -1.718  | -3.354 | 2.461   | 2.986   | 1.338                               | 7.546            | 13.684               |
| 251282_at                 | At3g61630 | AP2 domain-containing transcription factor                         | -1.580   | -1.436 | -1.854  | -3.335 | 1.956   | 5.579   | -2.114                              | 9                | 25.244               |
| 245998_at                 | At5g20830 | Sucrose synthase / sucrose-UDP glucosyltransferase (SUS1)          | -1.468   | -1.219 | -1.273  | -3.316 | 1.185   | 1.286   | -1.245                              | 4.275            | 1.724                |
| 254289_at                 | At4g22980 | Expressed protein                                                  | -1.558   | -1.071 | -3.998  | -3.199 | 3.166   | 2.146   | 2.203                               | 4.935            | 1                    |
| 259037_at                 | At3g09350 | Armadillo/beta-catenin repeat family protein                       | -2.366   | -2.054 | -5.947  | -3.057 | 15.208  | 18.458  | 6.865                               | 6.924            | 16.706               |
| 248657_at                 | At5g48570 | Peptidyl-prolyl cis-trans isomerase, putative                      | -1.856   | -1.962 | -3.241  | -3.034 | 2.934   | 23.687  | 10.086                              | 2.712            | 15.446               |
| 260248_at                 | At1g74310 | Heat shock protein 101 (HSP101)                                    | -1.990   | -2.361 | -12.066 | -3.032 | 22.170  | 27.069  | 127.793                             | 23.026           | 15.349               |
| 267559_at                 | At2g45570 | Cytochrome P450 76C2, putative                                     | -1.131   | -2.031 | -1.524  | -2.891 | 6.379   | 38.919  | 2.373                               | 55.778           | -1.143               |
| 267168_at                 | At2g37770 | Aldo/keto reductase family protein                                 | -2.199   | -1.899 | -1.860  | -2.819 | 8.493   | 5.367   | 1.292                               | 9.153            | -6.173               |
| 263150_at                 | At1g54050 | 17.4 kDa class III heat shock protein (HSP17.4-CIII)               | -1.319   | -1.576 | -4.230  | -2.812 | 8.584   | 12.186  | 10.343                              | -1.370           | -2.667               |
| 266368_at                 | At2g41380 | Embryo-abundant protein-related                                    | -1.892   | -1.361 | -1.731  | -2.697 | 4.181   | 10.090  | 52.879                              | 3.812            | 10.876               |
| 255259_at                 | At4g05020 | NADH dehydrogenase-related protein                                 | -1.047   | -1.182 | -1.990  | -2.644 | 2.398   | 3.054   | 1.497                               | 8.816            | 5.69                 |
| 262571_at                 | At1g15430 | Expressed protein                                                  | 1.085    | -1.277 | -2.232  | -2.585 | 4.936   | 4.482   | 5.155                               | 4.06             | 6.67                 |
| 263374_at                 | At2g20560 | DNAJ heat shock family protein                                     | -3.954   | -1.252 | -3.222  | -2.470 | 6.597   | 12.776  | 5.457                               | 4.911            | 10.784               |
| 253453_at                 | At4g31860 | Protein phosphatase 2C, putative                                   | -1.112   | -1.205 | -1.802  | -2.351 | 1.517   | 1.350   | 2.068                               | 4.962            | 1.179                |
| 254839_at                 | At4g12400 | Stress-inducible protein, putative                                 | -1.270   | -1.559 | -3.158  | -2.284 | 10.169  | 53.693  | 3.397                               | 5.247            | 44.309               |
| 251975_at                 | At3g53230 | Cell division cycle protein 48 (CDC48)                             | -1.792   | -1.046 | -1.338  | -2.281 | 3.573   | 8.340   | 1.264                               | 8.403            | 49.493               |
| 256245_at                 | At3g12580 | Heat shock protein 70, putative                                    | -4.193   | 1.085  | -1.921  | -2.241 | 4.985   | 9.506   | 14.257                              | 22.415           | 73.192               |
| 257058_at                 | At3g15352 | Cytochrome c oxidase copper chaperone-related                      | -1.550   | -1.101 | -1.514  | -2.182 | 1.924   | 2.503   | 1.917                               | 3.205            | 2.632                |
| 266461_at                 | At2g47730 | Glutathione S-transferase 6 (GST6)                                 | -1.217   | -1.202 | -1.905  | -2.169 | 3.266   | 2.635   | 2.957                               | 2.21             | 2.468                |
| 261618_at                 | At1g33110 | MATE efflux family protein                                         | -1.166   | -1.109 | -2.568  | -2.168 | 1.874   | 1.400   | 2.329                               | 5.825            | -1.035               |
| 245977_at                 | At5g13110 | Glucose-6-phosphate 1-dehydrogenase, putative                      | -1.498   | -1.035 | -1.831  | -2.150 | 1.409   | 1.780   | 1.406                               | 1.605            | 1.629                |
| 250934_at                 | At5g03030 | DNAJ heat shock protein                                            | -1.086   | -1.273 | -1.381  | -2.136 | 2.219   | 2.147   | 1.603                               | 2.028            | 2.952                |
| 254247_at                 | At4g23260 | Protein kinase family protein                                      | -1.319   | -1.427 | -1.582  | -2.102 | 1.275   | 1.106   | 1.344                               | 2.474            | -2.174               |
| 254759_at                 | At4g13180 | Short-chain dehydrogenase/reductase (SDR)                          | -1.308   | -1.153 | -2.522  | -2.006 | 3.361   | 4.646   | 3.827                               | 3.809            | 1.491                |
| 266841_at                 | At2g26150 | Heat shock transcription factor AtHsfA2                            | -1.830   | -2.228 | -7.661  | -1.992 | 27.644  | 112.818 | 55.233                              | 43.64            | 14.579               |
| 259705_at                 | At1g77450 | NAM transcription factor                                           | -1.404   | -1.296 | -2.805  | -1.942 | 5.027   | 3.390   | 4.663                               | 8.88             | -1.379               |
| 245854_at                 | At5g13490 | Mitochondrial ADP/ATP carrier protein 2 (ANT2)                     | -1.328   | -1.192 | -1.362  | -1.919 | 5.332   | 1.973   | 2.081                               | 2.761            | 1.559                |
| 260025_at                 | At1g30070 | SGS domain-containing protein                                      | -1.381   | -1.267 | -2.125  | -1.860 | 4.115   | 5.749   | 3.648                               | 1.907            | 5.894                |
| 254108_at                 | At4g25230 | C3HC4-type RING finger family protein                              | -1.618   | -1.119 | -1.600  | -1.859 | 1.627   | 1.832   | 1.289                               | 2.484            | 1.014                |
| 258794_at                 | At3g04710 | Ankyrin repeat family protein                                      | -1.888   | -1.165 | -1.951  | -1.852 | 1.332   | 2.688   | 1.811                               | 1.198            | 3.72                 |
| 256787_at                 | At3g13790 | Beta-fructosidase (BFRUCT1)                                        | -1.600   | -1.289 | -1.275  | -1.848 | 3.548   | 14.164  | -1.342                              | 2.873            | -1.475               |
| 245686_at                 | At5g22060 | DNAJ heat shock protein, putative                                  | -1.548   | -1.200 | -1.589  | -1.820 | 2.125   | 2.513   | 1.587                               | 3.597            | 4.885                |
| 267300_at                 | At2g30140 | UDP-glucuronosyl/UDP-glucosyl transferase                          | -1.627   | -1.155 | -1.788  | -1.816 | 2.199   | 3.868   | 3.433                               | 8.575            | 1.874                |
| 260327_at                 | At1g63840 | C3HC4-type RING finger family protein                              | -1.956   | -1.123 | -1.780  | -1.791 | 4.687   | 3.092   | 1.789                               | 4.487            | -1.064               |
| 255011_at                 | At4g10040 | Cytochrome c, putative                                             | -1.368   | -1.176 | -1.418  | -1.763 | 1.876   | 2.070   | 1.232                               | 2.889            | 4.433                |
| 265899_s_at               | At2g25700 | E3 ubiquitin ligase SCF complex subunit SKP1/ASK1                  | -1.479   | -1.072 | -1.170  | -1.754 | 1.797   | 3.061   | -1.321                              | 1.137            | 12.208               |
| 246879_at                 | At5g26110 | Expressed protein                                                  | -1.319   | -1.183 | -1.347  | -1.738 | 1.379   | 2.224   | -1.250                              | 1.439            | 1.471                |
| 257713_at                 | At3g27380 | Mitochondrial succinate dehydrogenase iron-sulphur subunit         | -1.317   | -1.296 | -1.268  | -1.714 | 2.064   | 1.946   | -1.004                              | 1.121            | 2.038                |
| 248607_at                 | At5g49480 | Sodium-inducible calcium-binding protein (ACP1)                    | -4.668   | -1.533 | -2.247  | -1.701 | 2.771   | 3.628   | 6.041                               | 4.247            | 1.322                |
| 252421_at                 | At3g47540 | Chitinase, putative                                                | -1.533   | -1.161 | -1.341  | -1.662 | 1.330   | 1.821   | 2.089                               | 7.659            | 16.929               |
| 261717_at                 | At1g18400 | Basic helix-loop-helix (bHLH) family protein                       | -1.134   | -1.310 | -1.366  | -1.648 | -1.264  | -1.238  | -1.178                              | -1.266           | -1.499               |
| 265200_s_at               | At2g36790 | UDP-glucuronosyl/UDP-glucosyl transferase                          | -1.935   | -1.668 | -2.861  | -1.634 | 5.608   | 4.382   | 6.839                               | 6.449            | 4.211                |
| 266253_at                 | At2g27840 | Histone deacetylase-related protein                                | -1.953   | -1.119 | -1.750  | -1.627 | 1.822   | 1.321   | -1.217                              | -2.105           | -1.040               |
| 265730_at                 | At2g32220 | 60S ribosomal protein L27 (RPL27A)                                 | -1.995   | 1.100  | -1.651  | -1.623 | 1.793   | 1.270   | -1.135                              | -1.232           | 1.06                 |
| 267181_at                 | At2g37760 | Aldo/keto reductase family protein                                 | -1.811   | -1.167 | -1.229  | -1.602 | 2.547   | 1.568   | 1.115                               | 5.122            | -1.621               |
| 258452_at                 | At3g22370 | Alternative oxidase 1a, mitochondrial (AOX1A)                      | -1.069   | -1.064 | -1.307  | -1.594 | 2.351   | 3.266   | 2.116                               | 4.205            | 8.89                 |
| 248258_at                 | At5g53400 | Nuclear movement family protein                                    | -1.450   | -1.111 | -1.362  | -1.572 | 2.396   | 3.286   | 1.014                               | 1.769            | 6.714                |
| 258979_at                 | At3g09440 | Heat shock cognate 70 kDa protein 3 (HSC70-3)                      | -3.433   | -1.219 | -1.947  | -1.563 | 2.648   | 2.408   | 2.321                               | 3.765            | 3.089                |
| 266934_at                 | At2g18900 | Transducin/WD-40 repeat family protein                             | -2.735   | -1.052 | -1.543  | -1.561 | 1.571   | 2.476   | -1.016                              | -1.733           | 4.665                |
| 248045_at                 | At5g56000 | Heat shock protein 81-2 (HSP81-2)                                  | -2.968   | -1.224 | -1.934  | -1.515 | 2.442   | 2.489   | 1.591                               | 1.882            | 3.199                |
| 250866_at                 | At5g03905 | HesB-like domain-containing protein                                | -1.469   | -1.375 | -1.188  | -1.505 | 1.744   | 1.446   | 1.061                               | 1.292            | 1.487                |
| 245365_at                 | At4g17720 | RNA recognition motif (RRM)-containing protein                     | -1.186   | -1.165 | -1.143  | -1.504 | 1.818   | 2.382   | -1.052                              | 3.754            | 4.697                |
| 264458_at                 | At1g10410 | Expressed protein                                                  | -1.353   | -1.110 | -1.116  | -1.483 | -1.058  | -1.086  | 1.133                               | 1.842            | 2.169                |
| 248743_at                 | At5g48240 | Expressed protein                                                  | -1.653   | -1.011 | -1.545  | -1.472 | 1.462   | 2.204   | -1.046                              | -1.100           | 3.82                 |
| 245352_at                 | At4g15490 | UDP-glucuronosyl/UDP-glucosyl transferase                          | -1.861   | -1.015 | -1.386  | -1.437 | -1.221  | 1.041   | 1.436                               | 3.105            | -1.597               |
| 257822_at                 | At3g25230 | Peptidyl-prolyl cis-trans isomerase / FK506-binding protein (ROF1) | -1.833   | -1.176 | -1.786  | -1.416 | 2.997   | 3.630   | 2.08                                | 1.338            | 5.813                |
| 265649_at                 | At2g27510 | Ferredoxin, putative                                               | -1.444   | 1.053  | -1.061  | -1.414 | 1.038   | 2.289   | 1.111                               | -1.098           | 1                    |
| 258678_at                 | At3g08690 | Ubiquitin-conjugating enzyme 11 (UBC11)                            | -1.071   | -1.058 | -1.121  | -1.401 | 1.936   | 2.418   | 1.255                               | 2.167            | 6.353                |
| 253013_at                 | At4g37910 | Mitochondrial heat shock protein 70                                | -1.698   | -1.086 | -1.442  | -1.400 | 1.373   | 1.467   | -1.064                              | 1.253            | 3.938                |
| 245349_at                 | At4g16690 | Esterase/lipase/thioesterase family                                | -1.830   | -1.527 | -1.335  | -1.376 | 1.634   | 1.821   | 1.156                               | 1.773            | -2.203               |
| 246559_at                 | At5g15550 | Transducin/WD-40 repeat family protein                             | -1.695   | -1.073 | -1.635  | -1.358 | 1.181   | 1.629   | -1.022                              | -1.076           | 1.959                |
| 263435_at                 | At2g28600 | Expressed protein                                                  | -1.463   | 1.025  | -1.677  | -1.344 | 1.127   | 1.793   | -1.233                              | -1.695           | 2.476                |
| 263251_at                 | At2g31410 | Expressed protein                                                  | -1.337   | -1.031 | -1.205  | -1.343 | 1.457   | 1.712   | -1.681                              | 1.208            | 1.475                |
| 253777_at                 | At4g28450 | Transducin/WD-40 repeat family protein                             | -1.776   | -1.014 | -1.342  | -1.342 | 1.185   | 1.751   | -1.142                              | -1.170           | 2.866                |
| 252482_at                 | At3g46670 | UDP-glucuronosyl/UDP-glucosyl transferase                          | -1.520   | -1.521 | -2.224  | -1.338 | 2.905   | 1.702   | 1.546                               | 2.123            | -5.155               |
| 251538_at                 | At3g58660 | 60S ribosomal protein-related                                      | -1.862   | -1.061 | -1.749  | -1.334 | 1.203   | 2.047   | -1.287                              | -1.245           | 2.211                |
| 264131_at                 | At1g79150 | Expressed protein                                                  | -2.123   | -1.147 | -1.560  | -1.334 | 1.004   | 1.516   | 1.046                               | -1.534           | 1.852                |
| 252625_at                 | At3g44750 | Histone deacetylase, putative                                      | -2.111   | -1.092 | -1.898  | -1.326 | 1.169   | 1.340   | -1.145                              | -2.033           | 2.288                |
| 247780_at                 | At5g58770 | Dehydrololichyl diphosphate synthase, putative                     | -4.758   | -1.225 | -1.279  | -1.317 | 1.591   | 1.397   | 1.068                               | 4.38             | 2.035                |

|                                                                                      |           |                                                          |        |        |        |        |        |        |        |        |         |
|--------------------------------------------------------------------------------------|-----------|----------------------------------------------------------|--------|--------|--------|--------|--------|--------|--------|--------|---------|
| 265850_at                                                                            | At2g35720 | DNAJ heat shock N-terminal domain-containing protein     | -1.914 | -1.168 | -1.246 | -1.314 | 1.162  | 1.450  | 1.117  | 1.602  | 4.931   |
| 247593_at                                                                            | At5g60790 | ATP-binding cassette (ABC) transport protein             | -1.179 | -1.225 | -1.548 | -1.313 | 1.460  | 1.734  | 1.051  | 1.454  | 1.45    |
| 263482_at                                                                            | At2g03980 | GDSL-motif lipase/hydrolase family protein               | -1.224 | -1.244 | -1.172 | -1.307 | -1.102 | -3.216 | -1.613 | 1.473  | -13.699 |
| 257658_at                                                                            | At3g13230 | Expressed protein                                        | -1.783 | -1.016 | -1.515 | -1.303 | 1.267  | 1.429  | -1.063 | -1.314 | 1.078   |
| 258104_at                                                                            | At3g23620 | Brix domain-containing protein                           | -1.621 | 1.022  | -1.453 | -1.302 | 1.033  | 1.613  | -1.299 | -1.070 | 1.717   |
| 258505_at                                                                            | At3g06530 | BAP28-related protein                                    | -2.169 | 1.081  | -1.793 | -1.301 | -1.118 | 1.904  | -1.290 | -1.475 | 2.153   |
| 248462_at                                                                            | At5g50960 | Nucleotide-binding family protein                        | -1.252 | 1.046  | -1.300 | -1.300 | 1.353  | 1.858  | 1.168  | 1.375  | 3.803   |
| 266299_at                                                                            | At2g29450 | Glutathione S-transferase (103-1A)                       | -1.615 | -1.097 | -1.497 | -1.295 | 1.674  | -1.343 | 2.219  | 2.879  | -1.036  |
| 258996_at                                                                            | At3g01800 | Ribosome recycling/releasing factor protein              | -1.617 | -1.030 | -1.328 | -1.292 | -1.073 | 1.216  | 1.108  | -1.056 | 4.314   |
| 254076_at                                                                            | At4g25340 | Peptidyl-prolyl cis-trans isomerase-related immunophilin | -2.113 | -1.110 | -1.657 | -1.292 | 1.050  | 2.045  | 1.087  | -1.340 | 2.861   |
| 256905_at                                                                            | At3g23990 | Chaperonin (CPN60) (HSP60)                               | -1.890 | -1.125 | -1.630 | -1.292 | 1.847  | 1.637  | 1.211  | 1.066  | 3.211   |
| 249344_at                                                                            | At5g40770 | Prohibitin                                               | -1.634 | -1.078 | -1.308 | -1.292 | 1.475  | 1.280  | -1.255 | -1.300 | 1.91    |
| 251787_at                                                                            | At3g55410 | 2-oxoglutarate dehydrogenase E1 component, putative      | -1.190 | -1.059 | -1.022 | -1.285 | 1.179  | 1.448  | 1.05   | 1.754  | 2.236   |
| 248043_s_at                                                                          | At5g56000 | Heat shock protein 81-4 (HSP81-4)                        | -1.895 | -1.160 | -1.608 | -1.264 | 1.506  | 1.440  | 1.192  | 1.349  | 2.226   |
| 263372_at                                                                            | At2g20450 | 60S ribosomal protein L14 (RPL14A)                       | -1.503 | -1.118 | -1.580 | -1.260 | 1.755  | 1.025  | -1.297 | -1.479 | 1.38    |
| 256797_at                                                                            | At3g18600 | DEAD/DEAH box helicase, putative                         | -1.967 | -1.053 | -1.683 | -1.259 | 1.063  | 1.463  | -1.381 | -1.739 | 2.372   |
| 257652_at                                                                            | At3g16810 | Pumilio/Puf RNA-binding domain-containing protein        | -2.035 | 1.045  | -1.811 | -1.258 | -1.046 | 2.211  | 1.017  | -1.247 | 2.031   |
| 258701_at                                                                            | At3g09720 | DEAD/DEAH box helicase, putative                         | -1.838 | -1.075 | -1.497 | -1.254 | 1.043  | 2.195  | -1.248 | -1.538 | 2.872   |
| 262933_at                                                                            | At1g65840 | Amine oxidase family protein                             | -1.730 | -1.017 | -1.505 | -1.249 | 1.602  | 1.619  | -1.227 | -1.107 | 1.363   |
| 262943_at                                                                            | At1g79470 | Inosine-5'-monophosphate dehydrogenase                   | -1.869 | -1.014 | -1.602 | -1.246 | -1.006 | 1.066  | -1.524 | -1.420 | 4.431   |
| 262956_at                                                                            | At1g54270 | Eukaryotic translation initiation factor 4A-2            | -1.205 | -1.006 | -1.159 | -1.246 | 1.423  | 1.285  | 1.256  | 1.276  | 1.524   |
|                                                                                      | At3g13920 |                                                          |        |        |        |        |        |        |        |        |         |
| 261011_at                                                                            | At1g26340 | Cytochrome b5, putative                                  | -1.573 | -1.039 | -1.265 | -1.235 | 1.250  | 1.455  | 1.017  | 1.361  | 2.123   |
| 265340_at                                                                            | At2g18330 | AAA-type ATPase family protein                           | -1.781 | -1.123 | -1.309 | -1.231 | 1.111  | 1.485  | 1.007  | -1.224 | 3.403   |
| 264803_at                                                                            | At1g08580 | Expressed protein                                        | -1.639 | -1.018 | -1.400 | -1.230 | 1.229  | 1.092  | -1.115 | -1.658 | 1.017   |
| 245164_at                                                                            | At2g33210 | Chaperonin, putative                                     | -1.642 | -1.050 | -1.407 | -1.224 | 1.281  | 1.598  | 1.013  | -1.368 | 2.48    |
| 246527_at                                                                            | At5g15750 | 40S ribosomal protein                                    | -1.566 | 1.113  | -1.289 | -1.224 | 1.067  | 1.550  | -1.087 | -1.185 | 1.999   |
| 251492_at                                                                            | At3g59280 | Signaling molecule-related protein                       | -1.187 | -1.044 | -1.212 | -1.219 | 1.752  | 1.718  | 1      | 1.655  | 2.047   |
| 250995_at                                                                            | At5g02500 | Heat shock cognate 70 kDa protein 1 (HSC70-1)            | -1.208 | -1.047 | -1.326 | -1.209 | 1.458  | 1.187  | 1.013  | 1.069  | 1.488   |
| 260049_at                                                                            | At1g29940 | DNA-directed RNA polymerase                              | -1.682 | 1.095  | -1.434 | -1.205 | 1.047  | 1.662  | -1.065 | -1.008 | 1.395   |
| 261377_at                                                                            | At1g18850 | Expressed protein                                        | -1.778 | -1.157 | -1.524 | -1.203 | -1.007 | 1.553  | -1.314 | -1.060 | 1.841   |
| 247453_at                                                                            | At5g62440 | Expressed protein                                        | -1.477 | -1.143 | -1.330 | -1.199 | -1.072 | 1.607  | -1.013 | -1.282 | 3.544   |
| 264452_at                                                                            | At1g10270 | Pentatricopeptide (PPR) repeat-containing protein        | -2.818 | 1.024  | -1.056 | -1.185 | 1.024  | 1.392  | -1.157 | -1.299 | 2.751   |
| 258532_at                                                                            | At3g06700 | 60S ribosomal protein L29 (RPL29A)                       | -1.221 | 1.010  | -1.319 | -1.183 | 1.048  | -1.179 | -1.264 | -1.309 | -1.134  |
| 260481_at                                                                            | At1g10960 | Ferredoxin, chloroplast, putative                        | -1.717 | 1.022  | -1.291 | -1.183 | 1.310  | -1.196 | 1.079  | -1.721 | -1.045  |
| 263474_at                                                                            | At2g31725 | Expressed protein                                        | -2.189 | 1.052  | -1.138 | -1.178 | 5.379  | 38.919 | 1.997  | -1.422 | 1.378   |
| 253867_at                                                                            | At4g27490 | 3' exoribonuclease family                                | -1.204 | 1.024  | -1.021 | -1.171 | 1.803  | 1.311  | 1.161  | -1.017 | -1.030  |
| 256523_at                                                                            | At1g66070 | Eukaryotic translation initiation factor (eIF-3 alpha)   | -1.210 | -1.035 | -1.278 | -1.168 | 1.224  | 1.465  | 1.132  | 1.083  | 2.22    |
| 250502_at                                                                            | At5g09590 | Heat shock protein 70                                    | -1.754 | 1.118  | -1.417 | -1.165 | 1.430  | 2.009  | 1.709  | 2.05   | 2.391   |
| 252952_at                                                                            | At4g38710 | Glycine-rich protein                                     | -1.455 | -1.082 | -1.310 | -1.163 | 1.823  | 1.624  | 1.362  | 1.257  | 1.965   |
| 247488_at                                                                            | At5g61820 | Expressed protein                                        | -1.137 | -1.074 | -1.370 | -1.163 | 2.339  | 2.088  | 3.607  | 2.78   | -1.042  |
| 260157_at                                                                            | At1g52930 | Expressed protein                                        | -2.182 | -1.087 | -1.528 | -1.156 | 1.015  | 1.629  | -1.340 | -1.616 | 1.691   |
| 267044_at                                                                            | At2g34357 | Expressed protein                                        | -1.864 | 1.093  | -1.463 | -1.148 | -1.429 | 1.675  | -1.724 | -1.142 | 3.369   |
| 260585_at                                                                            | At2g43650 | Sas10/U3 ribonucleoprotein                               | -1.592 | -1.197 | -1.727 | -1.147 | -1.337 | 1.884  | -4.348 | -1.938 | 2.45    |
| 250825_at                                                                            | At5g05210 | Nucleolar matrix protein-related                         | -1.100 | -1.130 | -1.417 | -1.133 | 1.920  | 1.914  | -1.008 | -1.164 | 2.663   |
| 263810_at                                                                            | At2g04520 | Eukaryotic translation initiation factor 1A (eIF1A)      | -1.108 | -1.014 | -1.210 | -1.112 | 1.707  | 1.152  | -1.019 | 1.38   | 1.544   |
| 256661_at                                                                            | At3g11964 | S1 RNA-binding domain-containing protein                 | -1.646 | 1.030  | -1.554 | -1.106 | -1.209 | 2.442  | -1.456 | -2.049 | 1.997   |
| 261296_at                                                                            | At1g48460 | Expressed protein                                        | -1.952 | 1.095  | -1.240 | -1.101 | 1.007  | 1.145  | 1.069  | -2.092 | 1.378   |
| 254654_at                                                                            | At4g18040 | Eukaryotic translation initiation factor 4E 1 (eIF-4E1)  | -1.313 | -1.007 | -1.238 | -1.099 | 1.310  | 1.115  | 1.011  | -1.091 | 1.655   |
| 264675_at                                                                            | At1g09830 | Phosphoribosylamine-glycine ligase (PUR2)                | -1.339 | 1.022  | -1.140 | -1.094 | 1.075  | -1.241 | -1.276 | -1.637 | 2.554   |
| 248582_at                                                                            | At5g49910 | Heat shock protein 70                                    | -1.927 | 1.005  | -1.320 | -1.033 | 1.060  | -1.198 | -1.074 | -1.121 | 1.424   |
| 252305_at                                                                            | At3g49240 | Pentatricopeptide (PPR) repeat-containing protein        | -1.453 | 1.180  | -1.278 | -1.026 | -1.001 | 1.746  | -1.171 | -1.546 | 2.74    |
| Number of genes showing at least threefold induction during the respective treatment |           |                                                          |        |        |        |        | 37     | 42     | 29     | 45     | 51      |

Relative expression data (transgenic to wild type or treatment to control) for all genes in cluster II are presented. Affymetrix probe set names, AGI codes, and descriptions are given. The induction/suppression of each gene by HL treatment in the hpAtPARP2 plants or catalase-deficient plants (CAT2HP1), or by the different oxidative stress causing treatments (H<sub>2</sub>O<sub>2</sub> spray, ozone fumigation, or syringolin treatment) is indicated. Yellow, orange, and red indicate transcript levels between three- and fourfold, four- and fivefold, and above fivefold, respectively. Expression data of transcripts with absent calls in both control and transgenic are indicated with A. For each oxidative stress experiment, the number of genes with at least threefold induction are indicated.
